# Supplementary material for: Asymmetrical sexual isolation but no postmating isolation between the closely related species Drosophila suboccidentalis and Drosophila occidentalis
Source: PubMed Central journal article supplement (PMC4369358; doi:10.1186/s12862-015-0328-y), 2015-03-12

**Supplemental Figure 1. Phenotypic Differences Between the Species.** Representative female and male individuals from *Drosophila suboccidentalis* (top) and *Drosophila occidentalis* (bottom), highlighting the difference in abdominal pigmentation between the two species.

*D. suboccidentalis* female

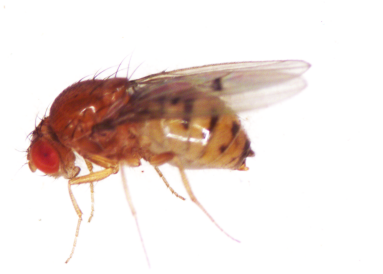

*D. suboccidentalis* male

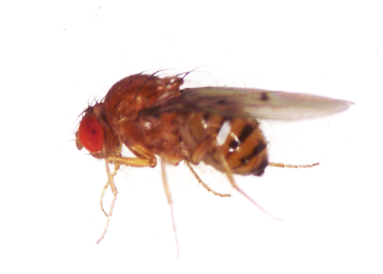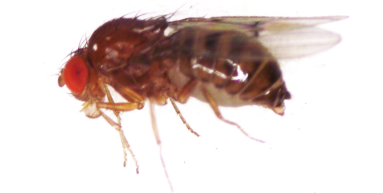

*D. occidentalis* female

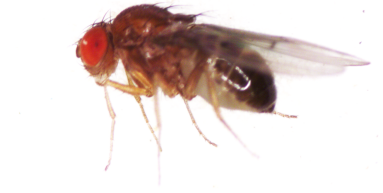

*D. occidentalis* male

**Supplemental Figure 2. Latency to copulation for each type of pure species cross.**

Only pairs that copulated are included. Horizontal bars indicate the median for each cross, and boxes represent upper and lower quartiles. “Subo” refers to *D. suboccidentalis* and “Occ” refers to *D. occidentalis*.

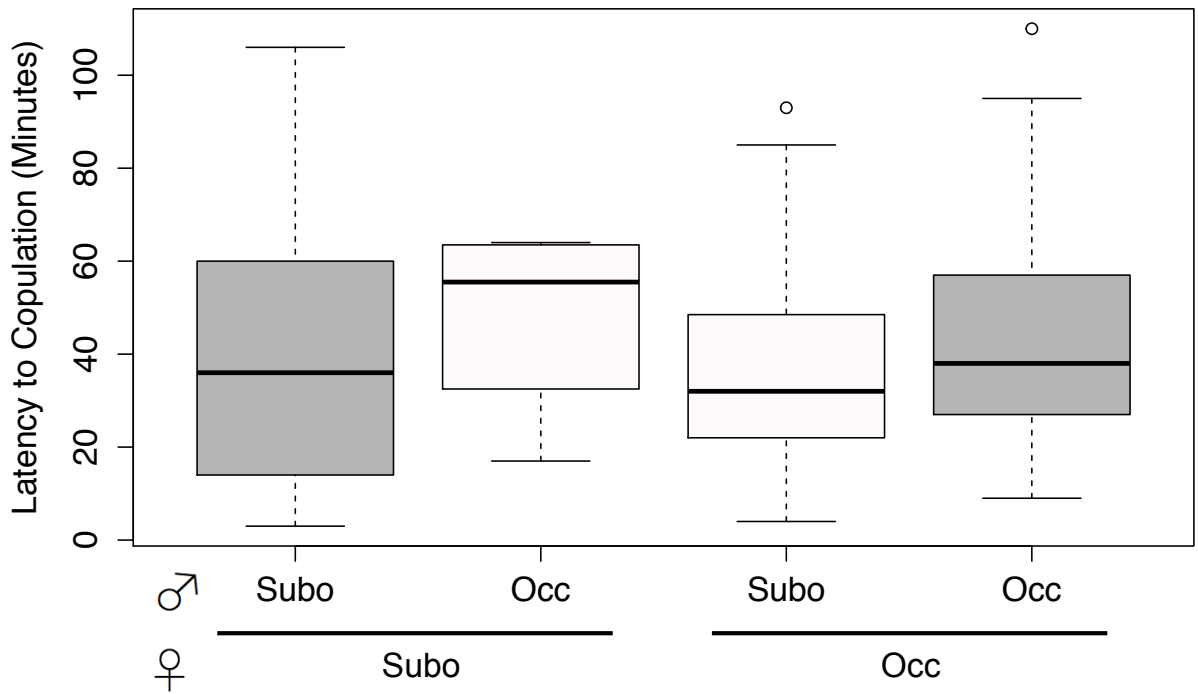

**Supplemental Figure 3. Latency to copulation for crosses involving hybrid individuals, compared to pure species controls.** Only pairs that copulated are included. Horizontal bars indicate the median for each cross, and boxes represent upper and lower quartiles. “Subo” refers to *D. suboccidentalis*, “Occ” refers to *D. occidentalis*, “F1(OxS)” refers to a F1 hybrid from a *D. occidentalis* female, and “F1(SxO)” refers to a F1 hybrid from a *D. suboccidentalis* female.

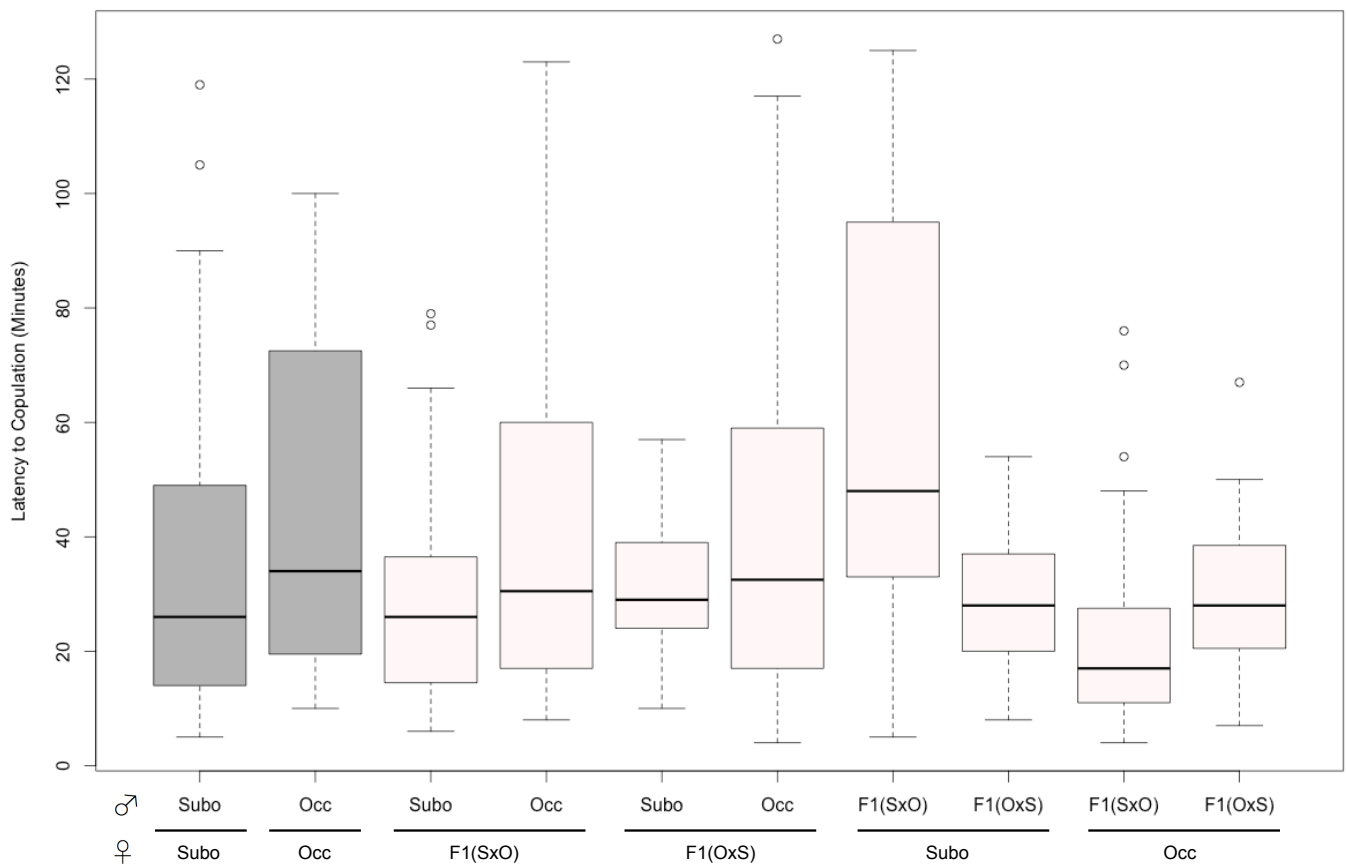

Supplement: 12862_2015_328_MOESM1_ESM.pdf [file 12862_2015_328_MOESM1_ESM.pdf]
